# Supplementary material
Source: Springer Nature journal article supplement (https://www.springermedizin.de/resource/supplementary/12913_2006_491_MOESM1_ESM.pdf/9534864)

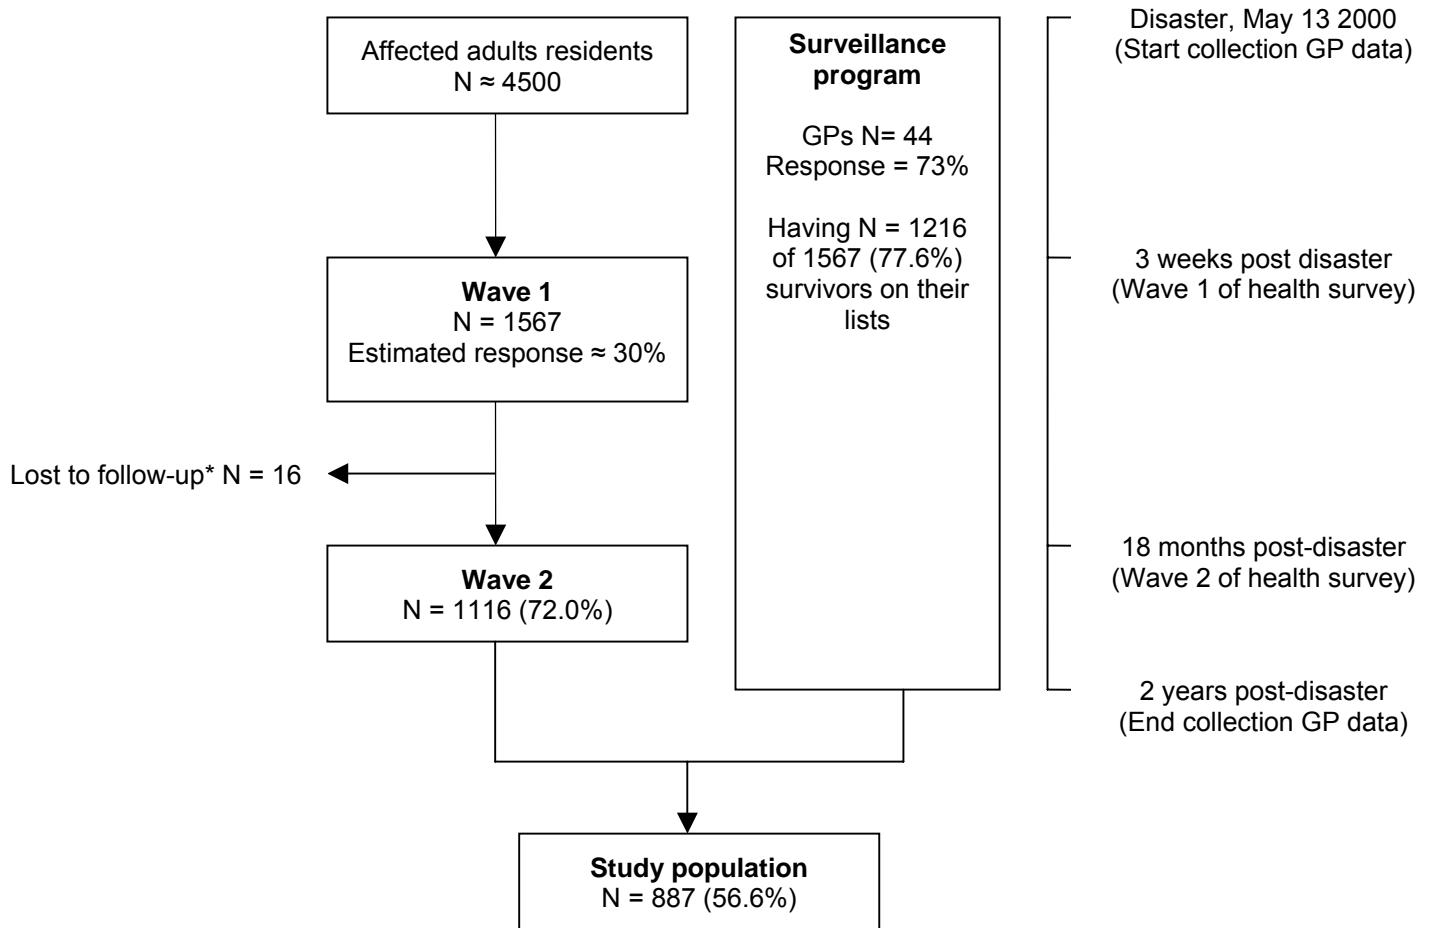

\* Lost to follow-up: deceased or emigrated

Supplement: MOESM1 [file 9534864]
